# Supplementary material for: T1-11, an adenosine derivative, ameliorates aging-related behavioral physiology and senescence markers in aging mice
Source: publisher site journal article supplement (doi:10.18632/aging.103279), 2020-06-05
Supplement: Supplementary file [file aging-v12i11-103279-supplementary-material-SD1.pdf]

SUPPLEMENTARY FIGURES

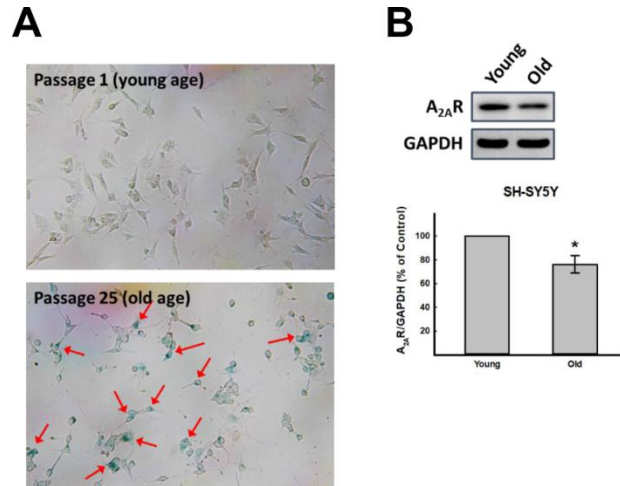

**Supplementary Figure 1. Characterization of senescent SH-SY5Y cells** (A) Micrographs of senescence-associated  $\beta$ -galactosidase activity in young-generation (passage 3) and senescent-generation (passage 25) SH-SY5Y cells. (B) Western blot analysis of levels of A<sub>2A</sub>R and loading control, GAPDH, in young-generation and senescent-generation SH-SY5Y cells.

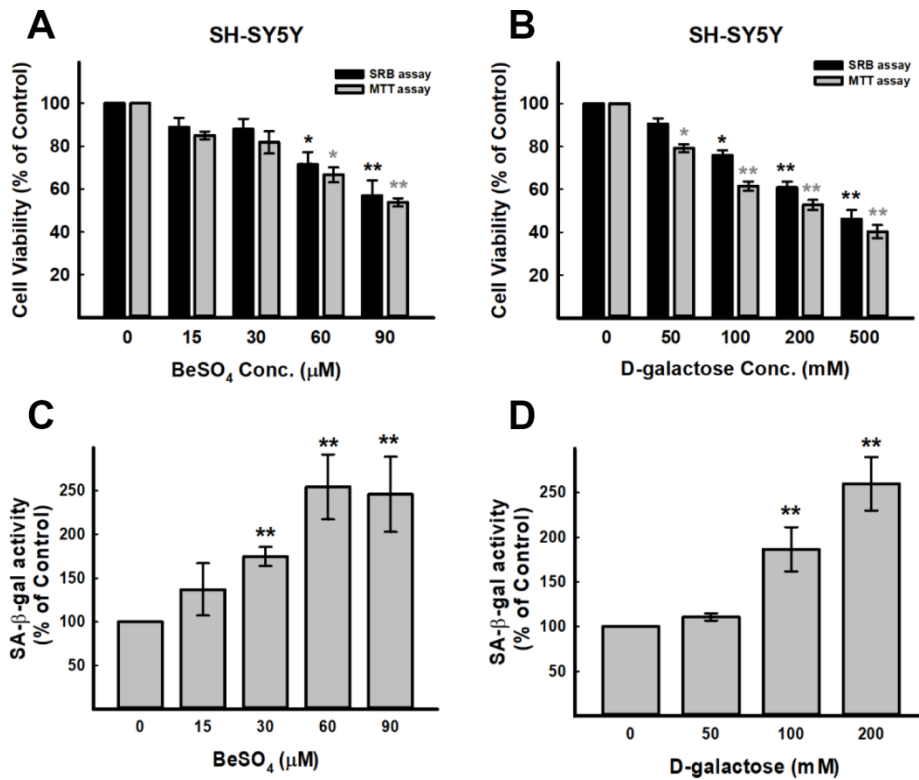

**Supplementary Figure 2. Building the cellular aging model.** Effect of (A) D-galactose and (B) BeSO<sub>4</sub> on cell viability. Effect of (C) D-galactose and (D) BeSO<sub>4</sub> on cellular senescence. Data are mean $\pm$ SEM. \**p* < 0.05, \*\**p* < 0.01 compared to control; ##*p* < 0.01 compared with D-gal treatment.

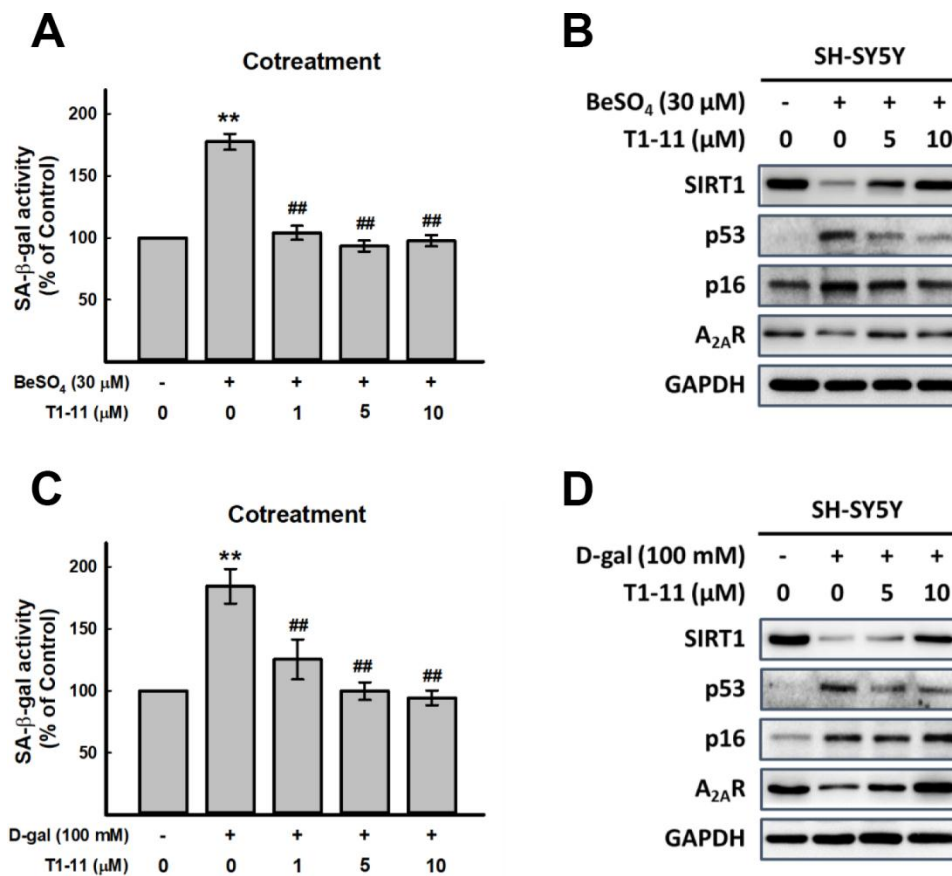

**Supplementary Figure 3. Effect of T1-11 on cellular senescence after BeSO<sub>4</sub>- and D-gal-induced senescence.** (A, C) Effect of cotreatment of T1-11 on BeSO<sub>4</sub>- and D-gal-induced cellular senescence markers, SA-β-gal activity, in SH-SY5Y cells. (B, D) Effect of co-treatment of T1-11 on BeSO<sub>4</sub>- and D-gal-induced cellular senescence related molecules in SH-SY5Y cells. Data are mean±SEM from at least four independent experiments. Significant difference between control and treated cells is indicated by \*\**p* < 0.01. Significant difference between the cells treated with D-gal or BeSO<sub>4</sub> alone and the cells treated with D-gal or BeSO<sub>4</sub> combined with T1-11 is indicated by #*p* < 0.05, ##*p* < 0.01.

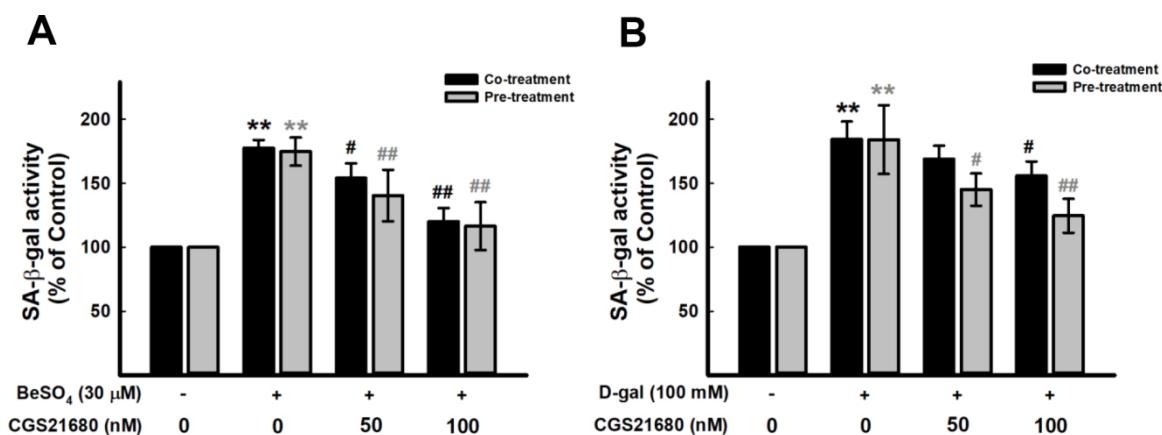

**Supplementary Figure 4. Effect of CGS21680 on cellular senescence after BeSO<sub>4</sub>- and D-gal-induced senescence.** (A, B) Effect of co-treatment and pre-treatment of CGS21680 on BeSO<sub>4</sub>- and D-gal-induced cellular senescence markers, SA-β-gal activity, in SH-SY5Y cells. Data are mean±SEM from at least three independent experiments. Significant difference between control and treated cells is indicated by \*\*\**p* < 0.01. Significant difference between the cells treated with D-gal or BeSO<sub>4</sub> alone and the cells treated with D-gal or BeSO<sub>4</sub> combined with CGS21680 is indicated by #*p* < 0.05, ##*p* < 0.01.

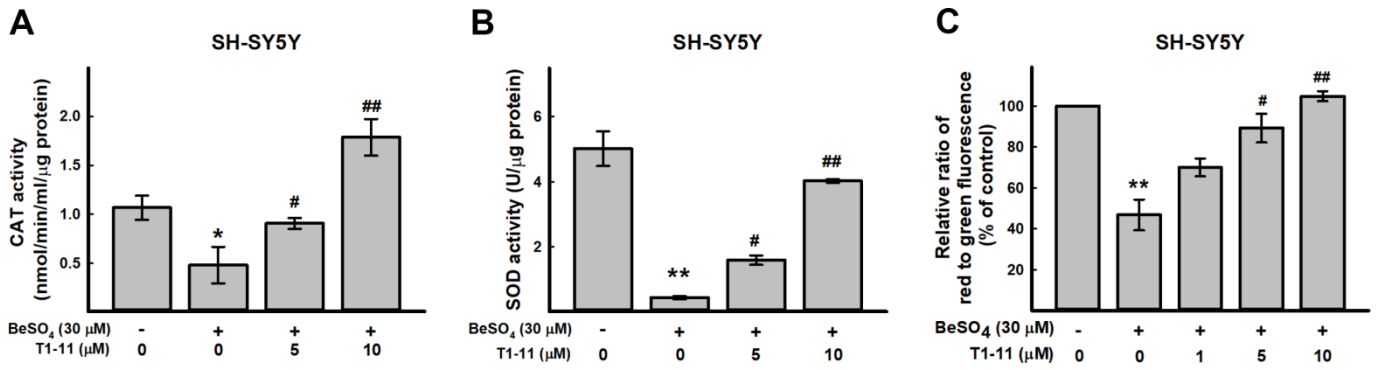

**Supplementary Figure 5. Effect of T1-11 on activities of antioxidant enzymes and mitochondrial membrane potential ( $\Delta\Psi_m$ ) in BeSO<sub>4</sub>-induced aging SH-SY5Y cells.** Effect of T1-11 on (A) superoxide dismutase (SOD) and (B) catalase (CAT) activities in SH-SY5Y cells with BeSO<sub>4</sub> treatment. (C) SH-SY5Y cells were pre-treated with T1-11 for 24 hr, then exposed to 30 μM BeSO<sub>4</sub> for 24 hr. Quantification of  $\Delta\Psi_m$  observed by spectrophotometry. T1-11 protects against  $\Delta\Psi_m$  damage in SH-SY5Y cells injured by BeSO<sub>4</sub>. Data are mean  $\pm$  SD. \*  $p < 0.05$ , \*\*  $p < 0.01$  compared to control; #  $p < 0.05$ , ##  $p < 0.01$  compared with D-gal or BeSO<sub>4</sub> treated cells at the same incubation time.

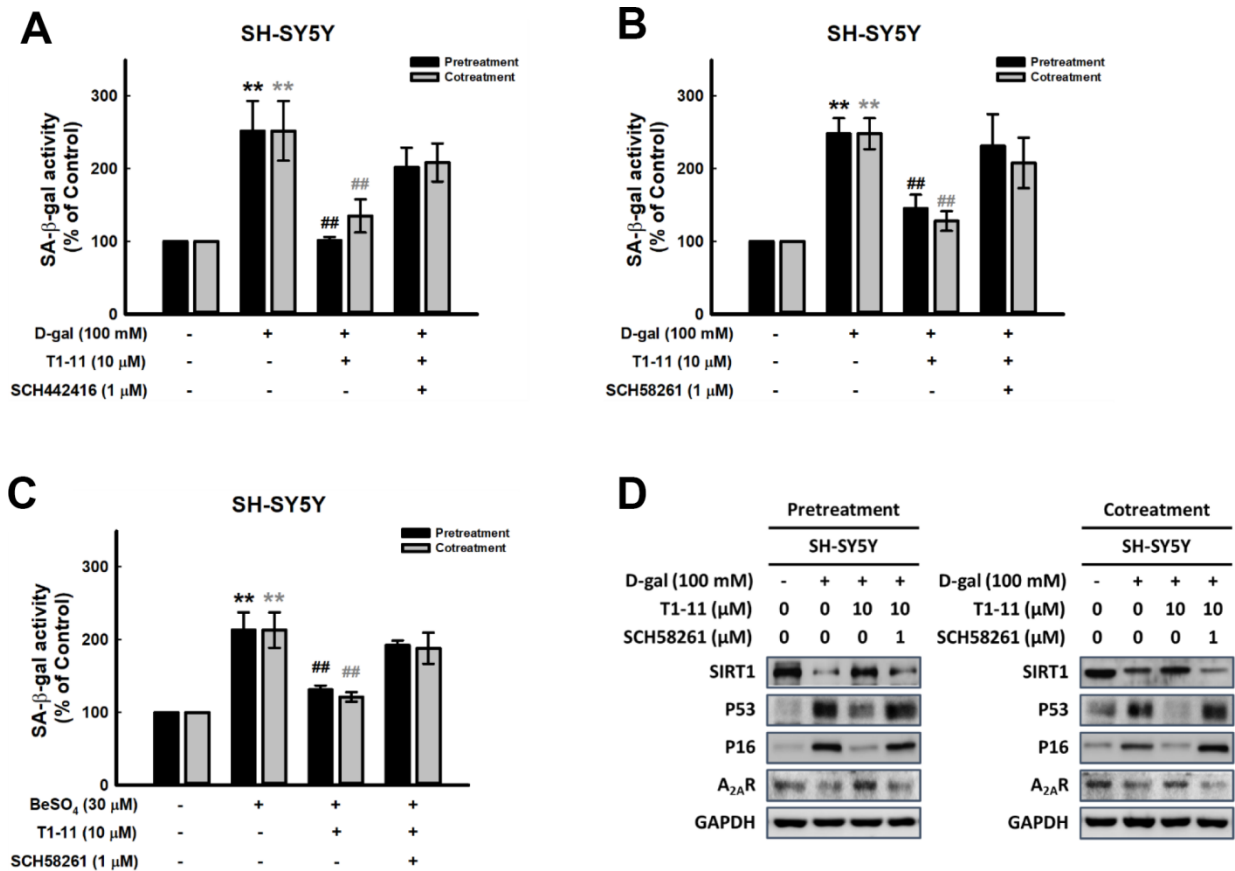

**Supplementary Figure 6. Effect of combination of T1-11 and A<sub>2A</sub>R specific antagonists on cellular senescence after BeSO<sub>4</sub>- or D-gal-induced senescence.** (A, B) Effect of co-treatment or pre-treatment of T1-11 and combination of T1-11 and A<sub>2A</sub>R specific antagonists (SCH442416 or SCH58261) on D-gal-induced cellular senescence markers, SA-β-gal activity, in SH-SY5Y cells. (C) Effect of co-treatment or pre-treatment of T1-11 and combination of T1-11 and SCH58261 on BeSO<sub>4</sub>-induced cellular senescence markers, SA-β-gal activity, in SH-SY5Y cells. (D) Effect of co-treatment or pre-treatment of T1-11 and SCH58261 on D-gal-induced cellular senescence related molecules in SH-SY5Y cells. Data are mean  $\pm$  SEM from at least four independent experiments. Significant difference between control and treated cells is indicated by \*\* $p < 0.01$ . Significant difference between the cells treated with D-gal or BeSO<sub>4</sub> alone and the cells treated with D-gal or BeSO<sub>4</sub> combined with T1-11 is indicated by # $p < 0.05$ , ## $p < 0.01$ .

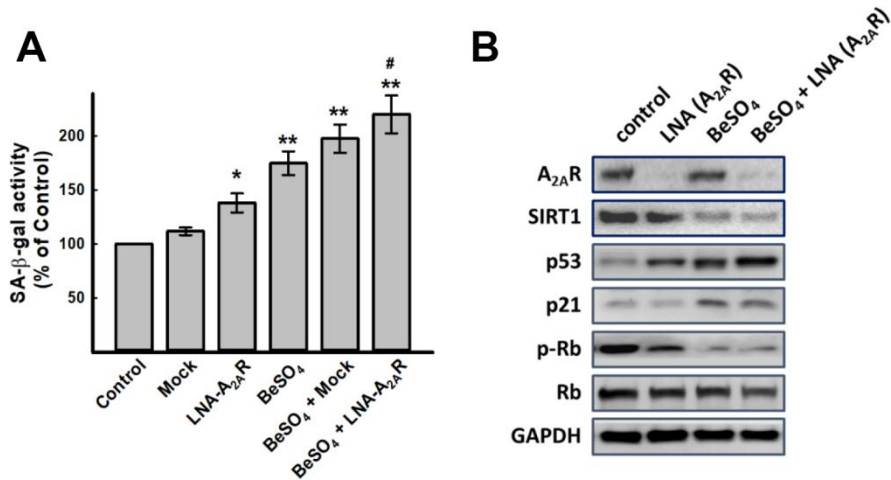

**Supplementary Figure 7. Effect of A<sub>2A</sub>R silencing on cellular senescence in SH-SY5Y cells.** Effect of the combination with LNA(A<sub>2A</sub>R) and BeSO<sub>4</sub> on cellular senescence detected by (A) cellular senescence assay and (B) western blot assay. Data are mean±SEM. \**p* < 0.05, \*\* *p* < 0.01 compared to control group; # *p* < 0.05, ## *p* < 0.05 compared with BeSO<sub>4</sub> treated cells.

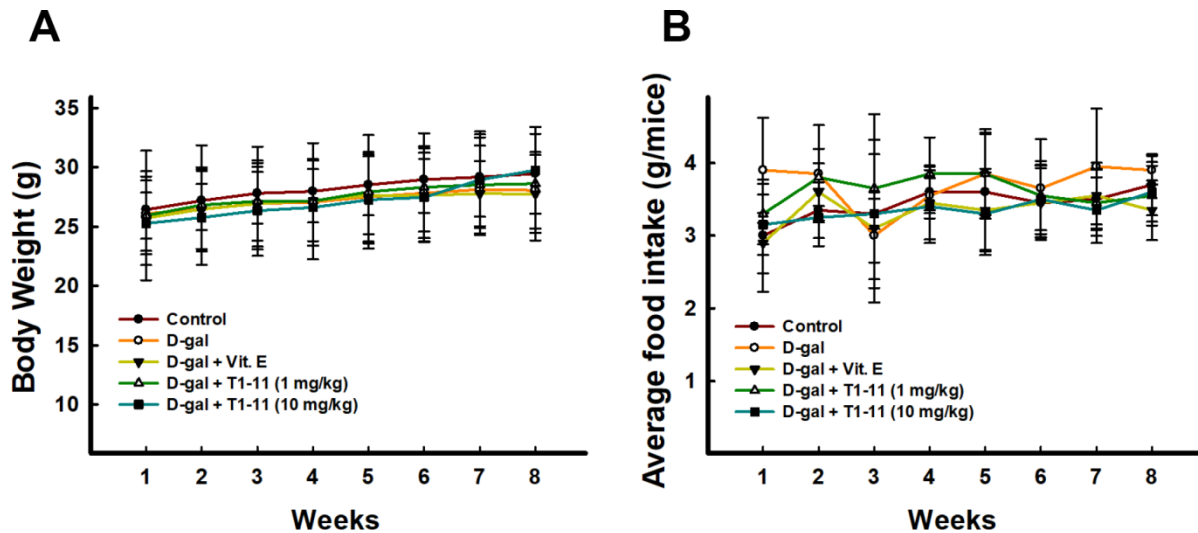

**Supplementary Figure 8. Effect of T1-11 on body weight and food intake of D-gal-induced aging mice.** Changes in body weight (A) and food intake (B) of the mice treated with D-gal alone and the mice treated with D-gal combined with Vit.E or T1-11 groups. All data are shown as mean ± SEM (n=6).

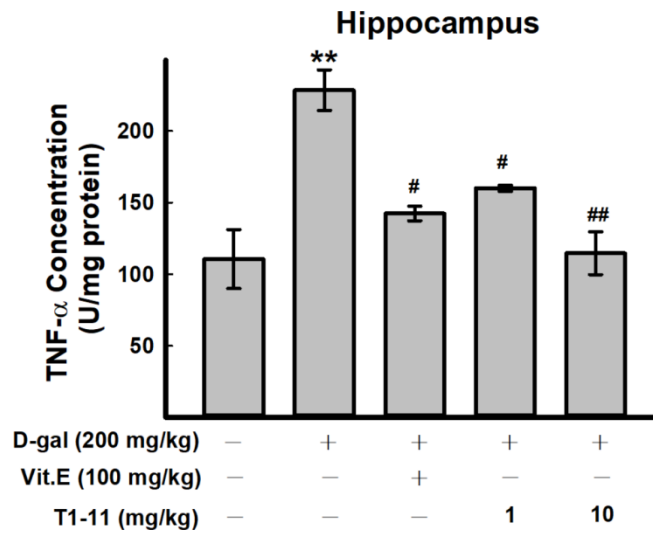

**Supplementary Figure 9. Effect of T1-11 on TNF- $\alpha$  in hippocampus of D-gal-induced aging mice.** The hippocampus tissue was collected for ELISA detection. The levels of TNF- $\alpha$  were shown as above. Values represent means  $\pm$  SEM (n=6). \*\*\*  $p < 0.001$ , \* $p < 0.05$  (versus the control group); ## $p < 0.01$ , # $p < 0.05$  (versus the D-gal groups).

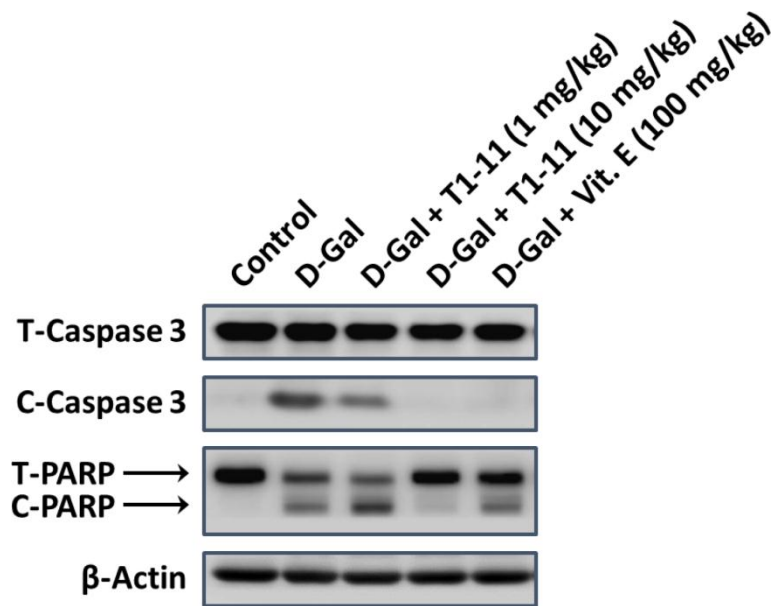

**Supplementary Figure 10. T1-11 could decrease D-galactose-induced apoptosis in hippocampus of D-gal-induced aging mice.** Western blot analysis of apoptosis related molecules markers in hippocampus of D-gal-induced aging mice.
